# Supplementary material for: Single step synthesis of a polymer supported palladium composite: a potential anode catalyst for the application of methanol oxidation
Source: Royal Society of Chemistry journal article supplement (doi:10.1039/c6ra05811f), 2016-01-01
Supplement: c6ra05811f1.pdf [file c6ra05811f1.pdf]

**Supporting Document:**

**Single step synthesis of polymer supported palladium composite: A potential anode catalyst for the application of methanol oxidation**

**Samarjeet Siwal, Meenakshi Choudhary, Siyasanga Mpelane, Raugmé Brink, Kaushik Mallick\***

Department of Chemistry, University of Johannesburg, P.O. Box: 524, Auckland Park 2006, South Africa.

**Figure S1:**

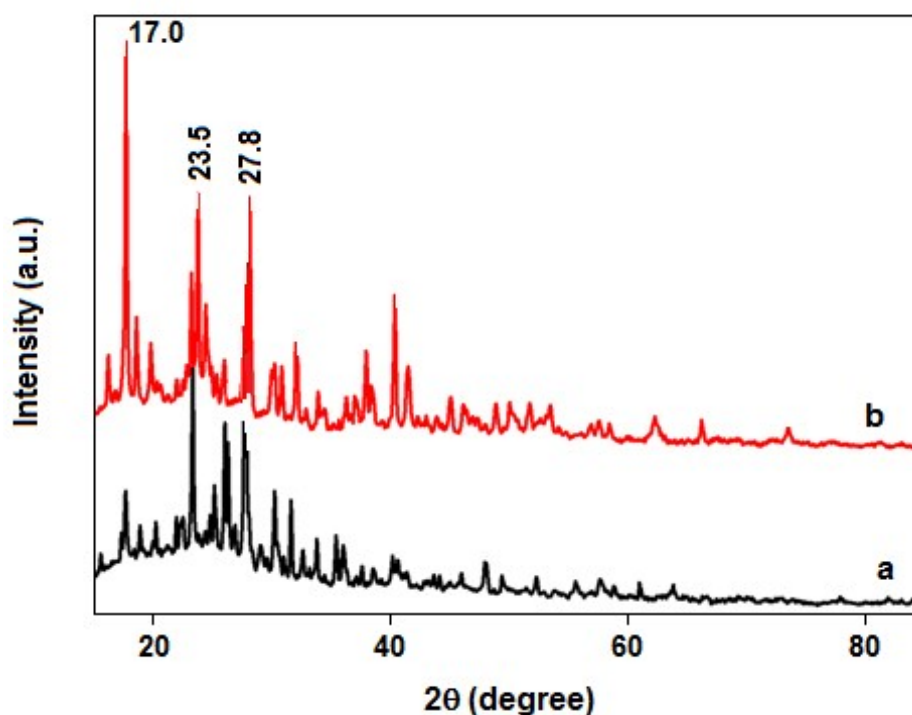

**Figure S1:** The comparative XRD image shows the difference of crystalline behaviour between the samples, pTA (a) and Pd-pTA (b).

Figure: S2

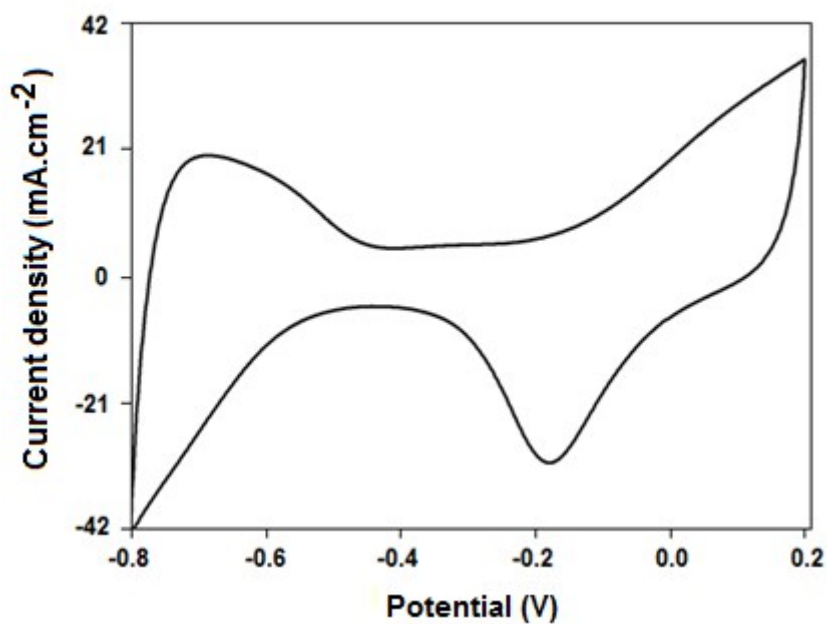

**Figure S2:** Cyclic voltammogram of Pd-*p*TA modified GC electrode in presence of 0.5 mol dm<sup>-3</sup> KOH under the scan rate of 50 mVs<sup>-1</sup>.

Figure: S3

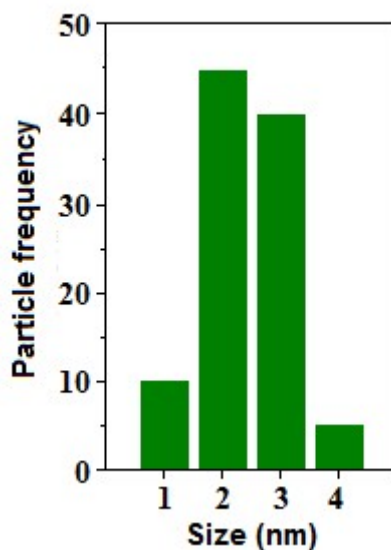

**Figure S3:** The histogram for the palladium nanoparticles, synthesized on the electrode during the methanol oxidation.

Figure: S4

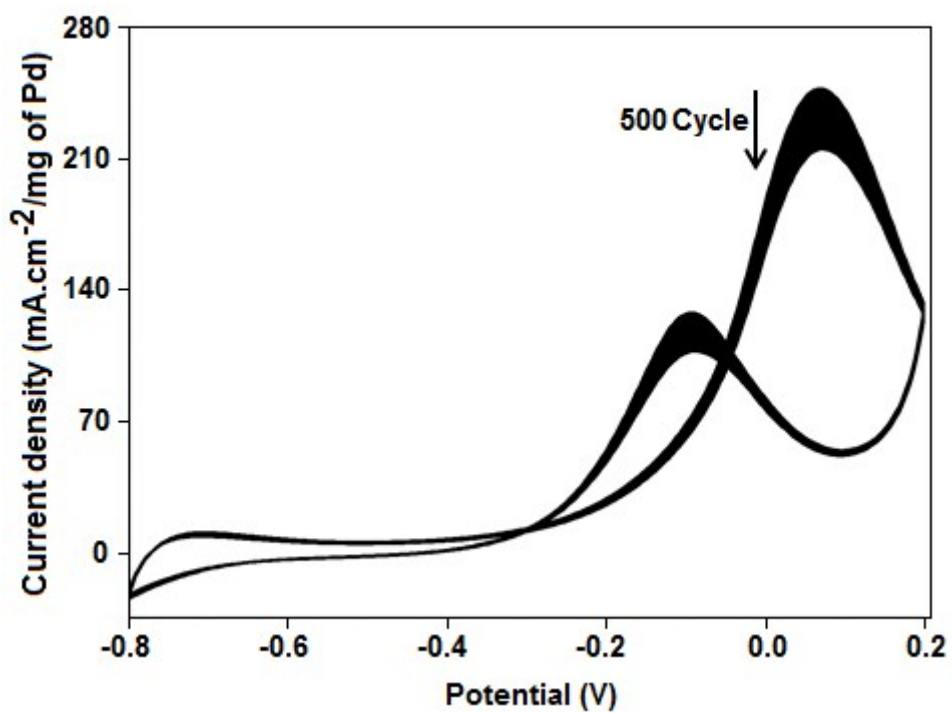

**Figure S4:** The normalized cyclic voltammogram in mA.cm<sup>-1</sup> per mg of Pd loading, for the stability study of Pd-pTA catalyst on glassy carbon electrode in the presence of 1.0 mol. dm<sup>-3</sup> methanol in 0.5 mol. dm<sup>-3</sup> KOH under the scan rate of 50 mV/s for 500 cycles.
